# Supplementary material for: Amino-functionalised conjugated porous polymers for improved photocatalytic hydrogen evolution
Source: Royal Society of Chemistry journal article supplement (doi:10.1039/c9ta06219j), 2019-01-01
Supplement: c9ta06219j1.pdf [file c9ta06219j1.pdf]

# Amino-functionalized Conjugated Porous Polymers for Improved Photocatalytic Hydrogen Evolution

Kaiwen Lin<sup>‡</sup>, Zhenfeng Wang<sup>‡</sup>, Zhicheng Hu<sup>\*</sup>, Peng Luo, Xiye Yang, Xi Zhang,  
Muhammad Rafiq, Fei Huang<sup>\*</sup> and Yong Cao

<sup>‡</sup>These authors contributed equally.

Institute of Polymer Optoelectronic Materials and Devices, State Key Laboratory of Luminescent  
Materials and Devices, South China University of Technology, Guangzhou 510640, P. R. China

E-mail: \* scut\_hzc@126.com; \* msfhuang@scut.edu.cn

## Support Information

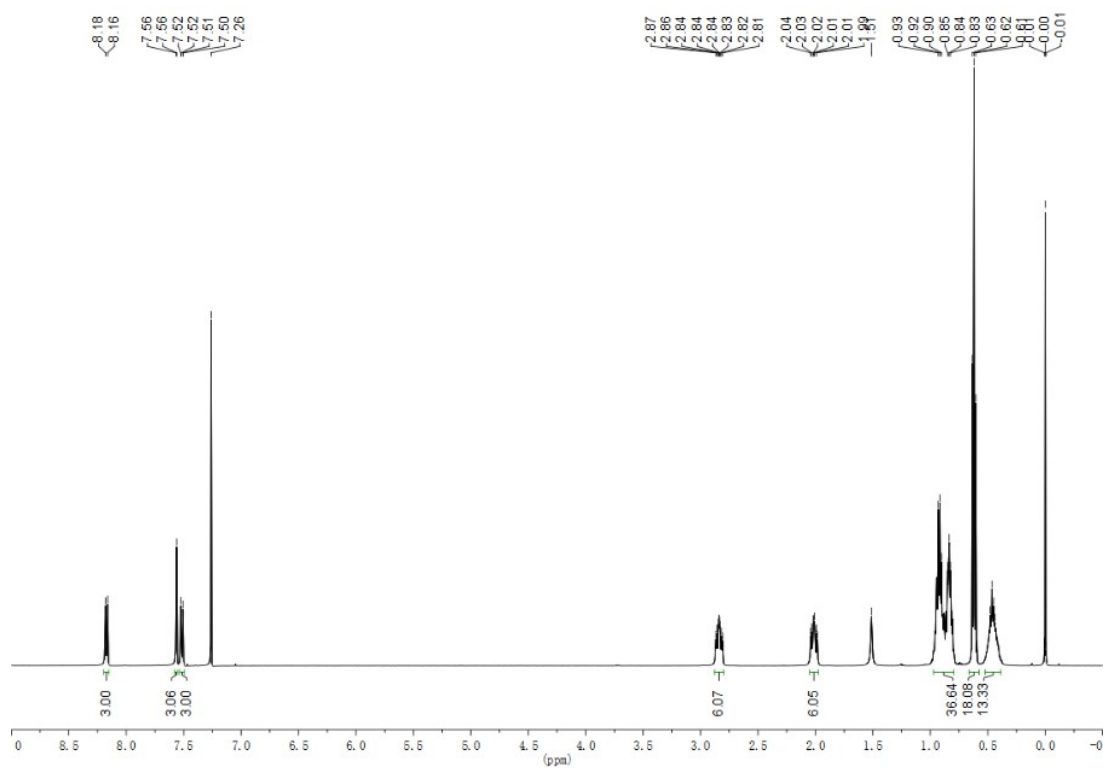

Fig. S1 <sup>1</sup>H NMR spectrum of Tr-3Br.

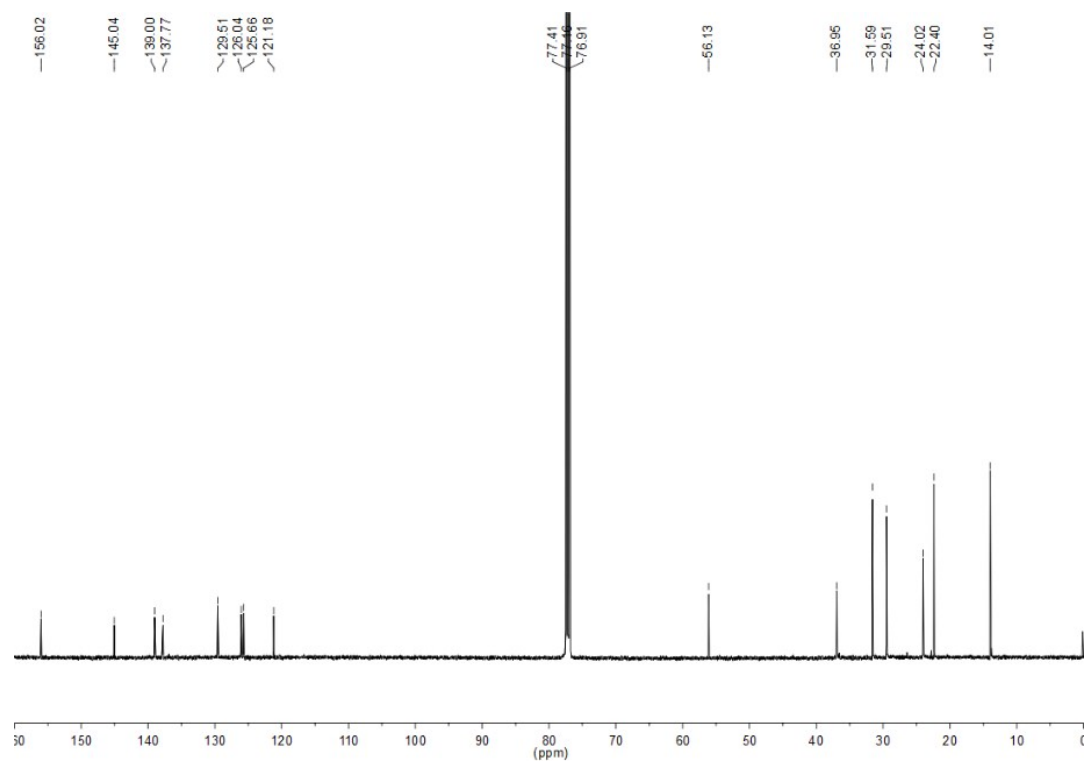

Fig. S2 <sup>13</sup>C NMR spectrum of Tr-3Br.

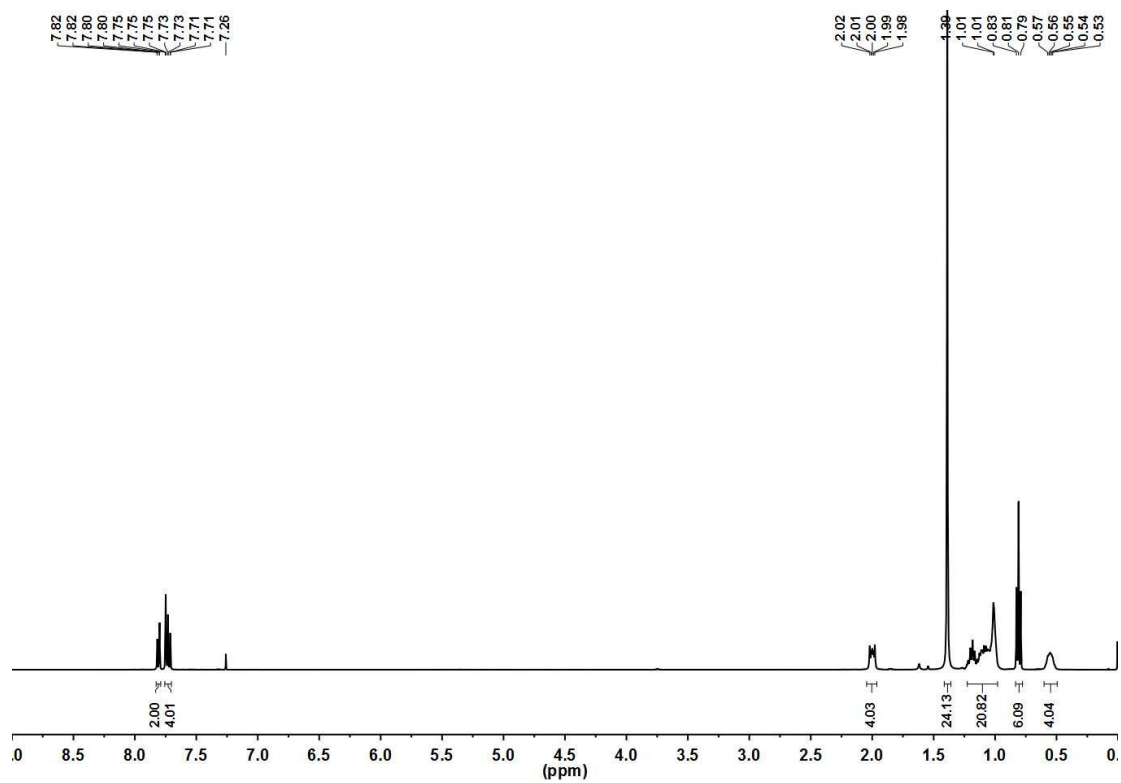

Fig. S3  $^1\text{H}$  NMR spectrum of F8-2BO.

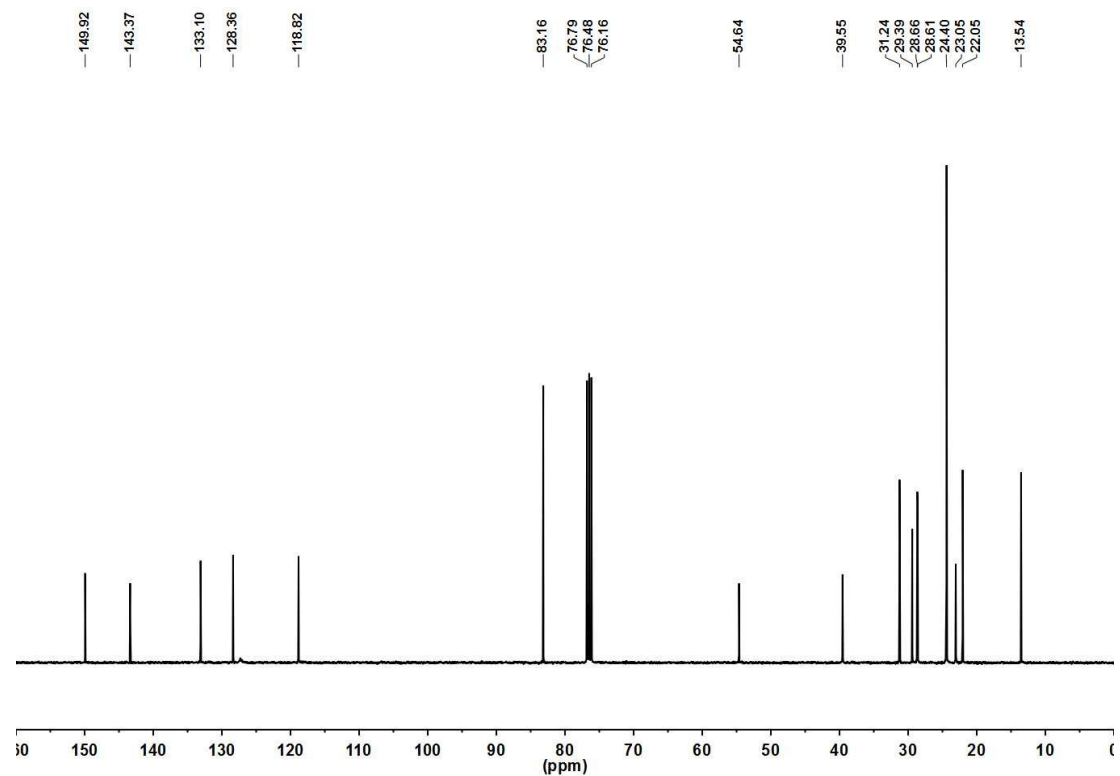

Fig. S4  $^{13}\text{C}$  NMR spectrum of F8-2BO.

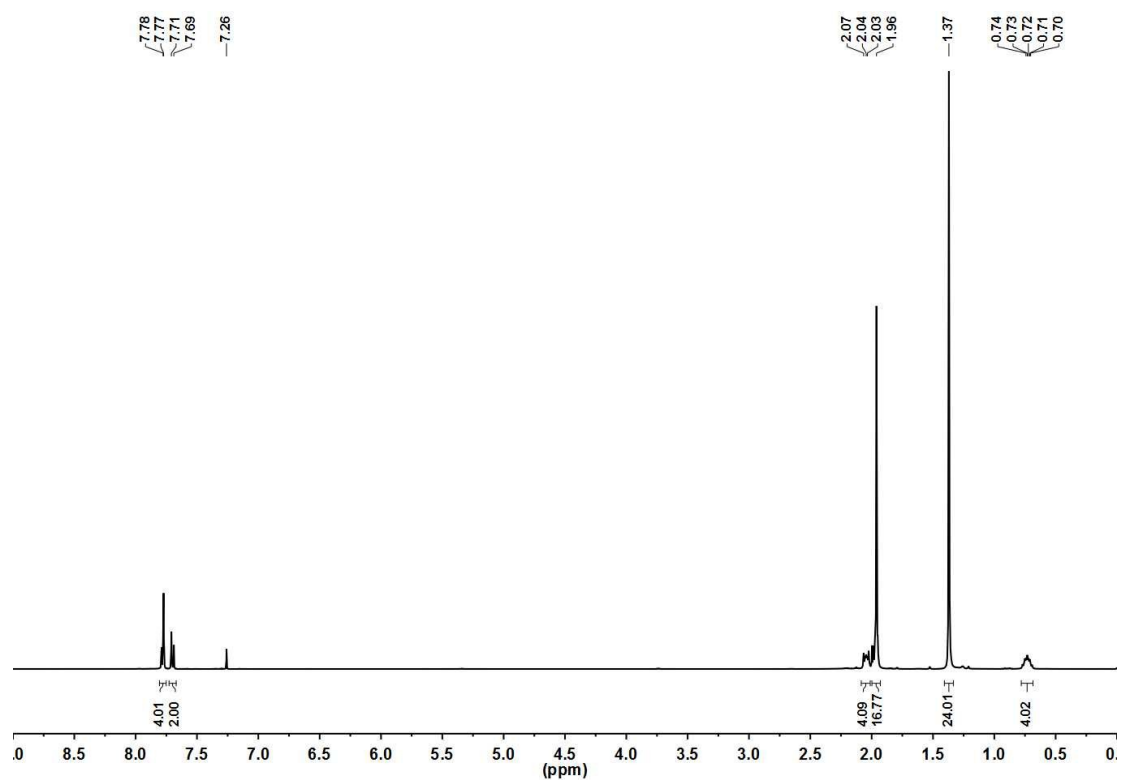

Fig. S5  $^1\text{H}$  NMR spectrum of F3N-2BO.

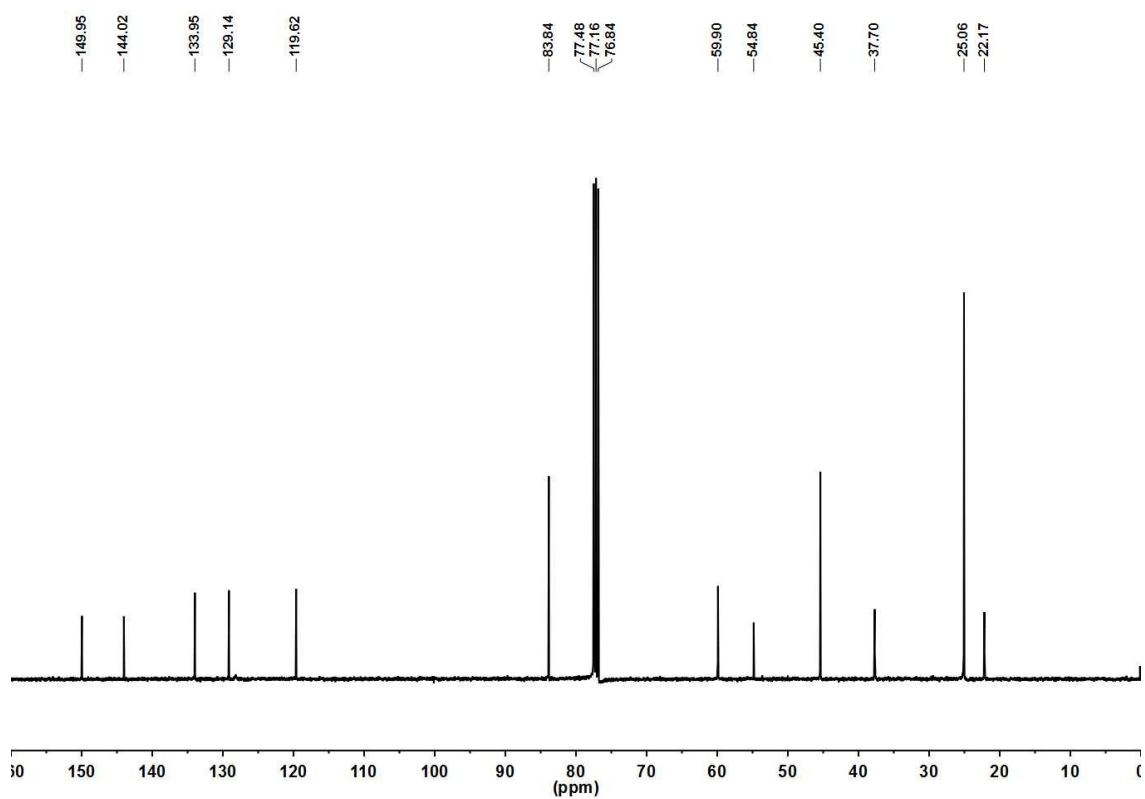

Fig. S6  $^{13}\text{C}$  NMR spectrum of F3N-2BO.

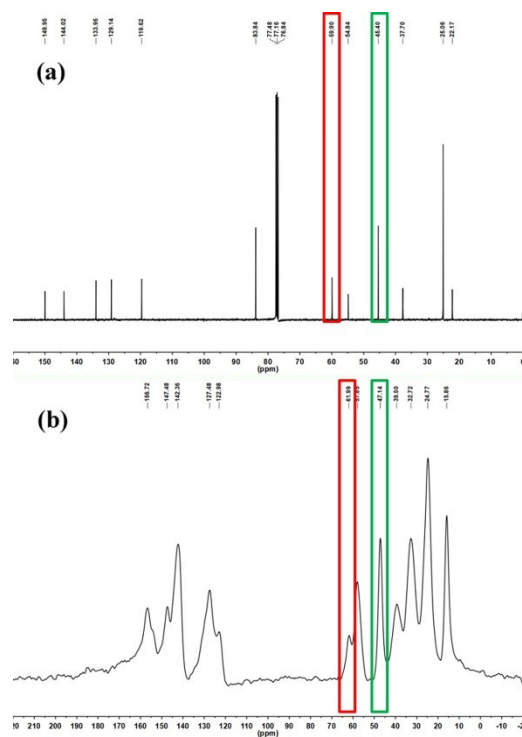

**Fig. S7** (a)  $^{13}\text{C}$  NMR spectrum of F3N-2BO and (b) the solid-state  $^{13}\text{C}$  NMR spectra of Tr-F3N.

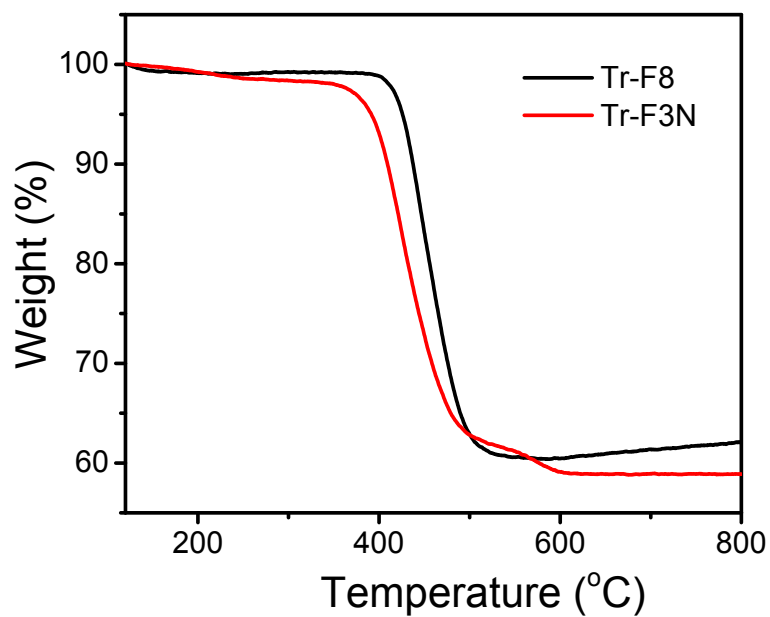

**Fig. S8** TGA of the Tr-F8 and Tr-F3N.

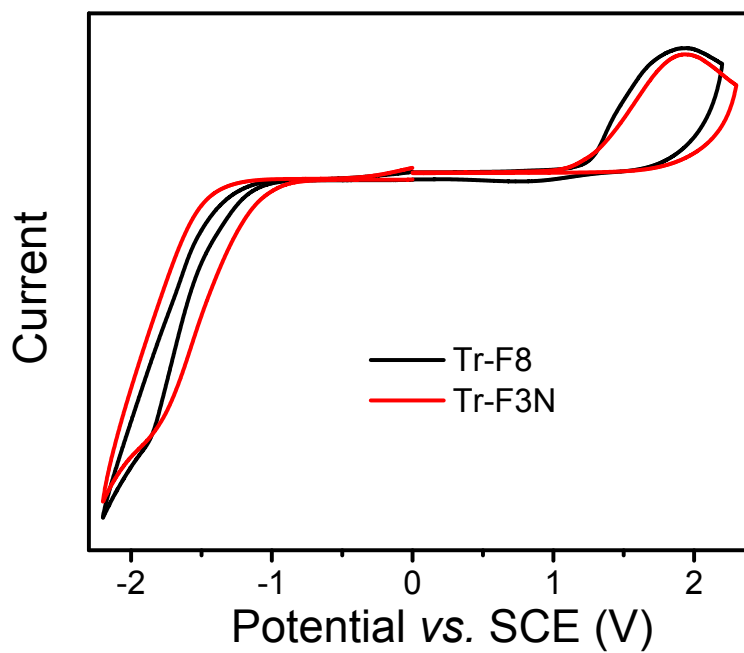

Fig. S9 Cyclic voltammometry measurement of the Tr-F8 and Tr-F3N.

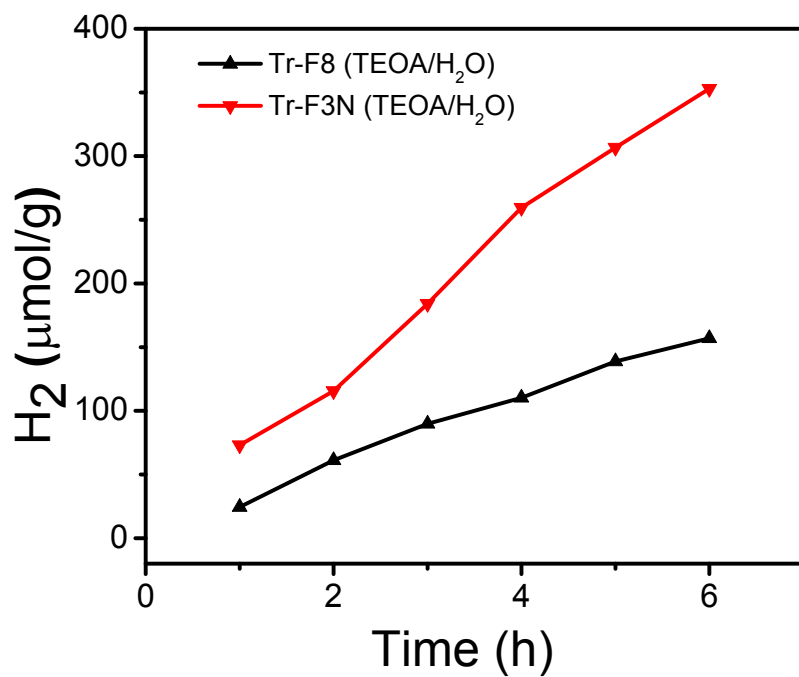

Fig. S10 Hydrogen evolution for Tr-F8 and Tr-F3N as a function of time (50mL of TEOA/H<sub>2</sub>O, 1:9 (v:v)).

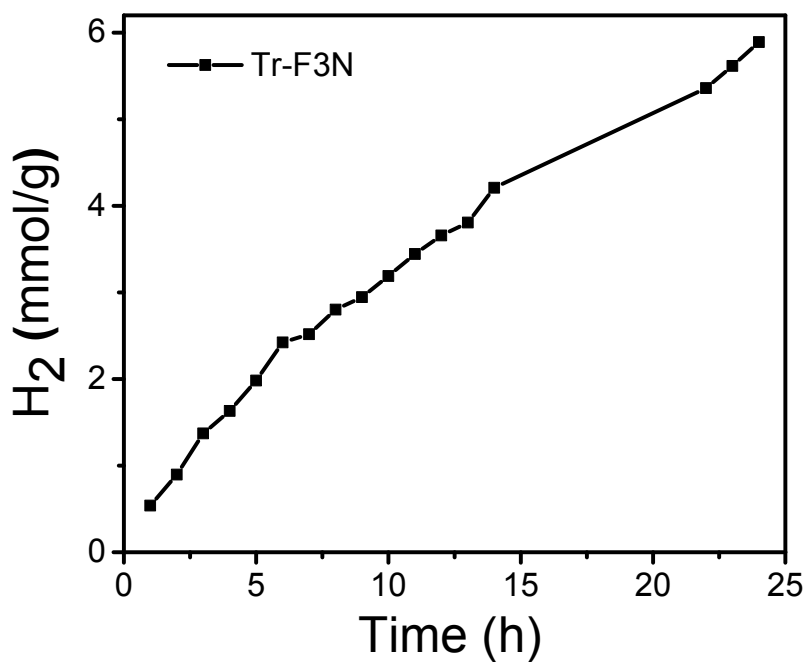

**Fig. S11** Hydrogen evolution as a function of time of Tr-F3N (50mL of TEOA/ethylene glycol (EG)/ $H_2O$ , 1:3:6 (v:v)).

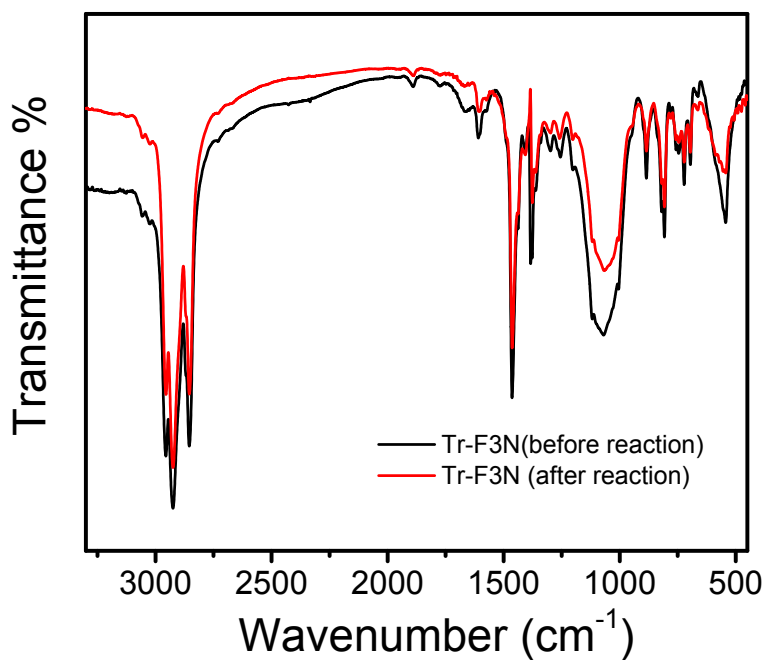

**Fig. S12** FTIR spectra of Tr-F3N before and after reaction.

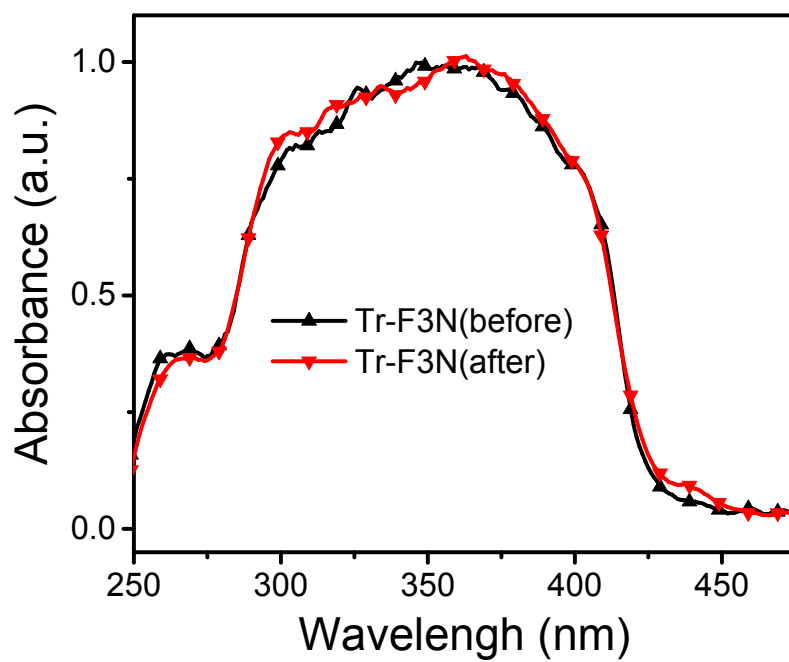

**Fig. S13** The UV-vis diffuse reflectance spectra of Tr-F3N as synthesized and after 24-h photocatalysis.

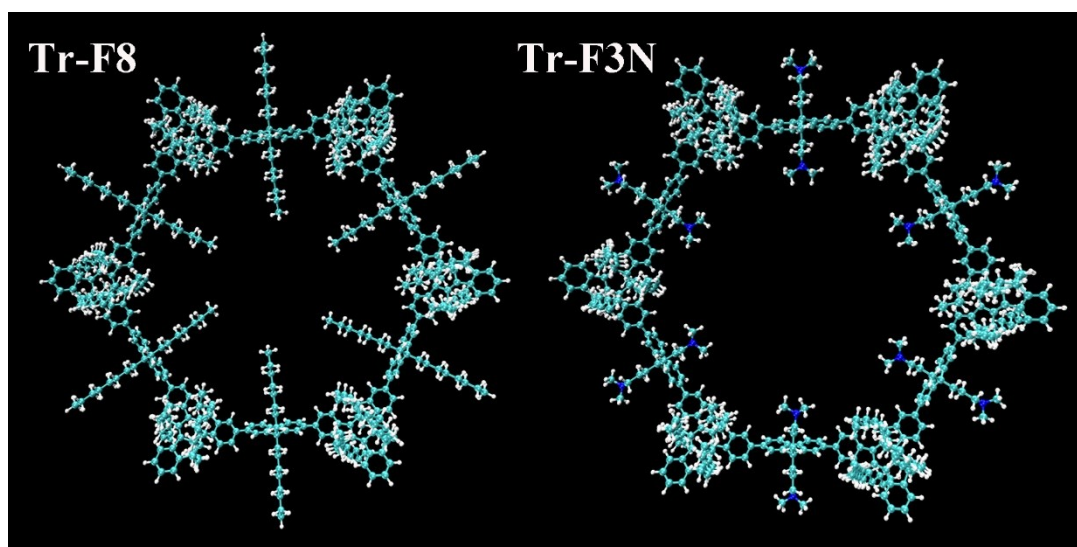

**Fig. S14** DFT calculated molecular geometries of M-F8 and M-F3N.



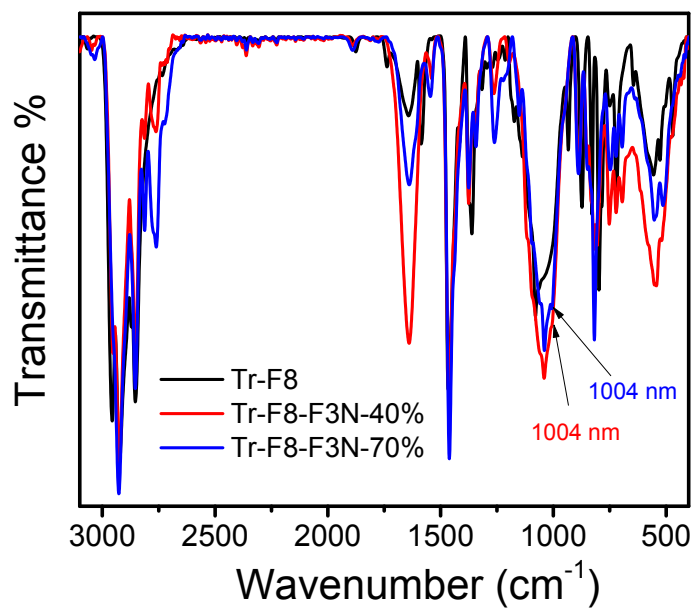

**Fig. S15** FTIR spectra of Tr-F8, Tr-F8-F3N-40%, and Tr-F8-F3N-70%.

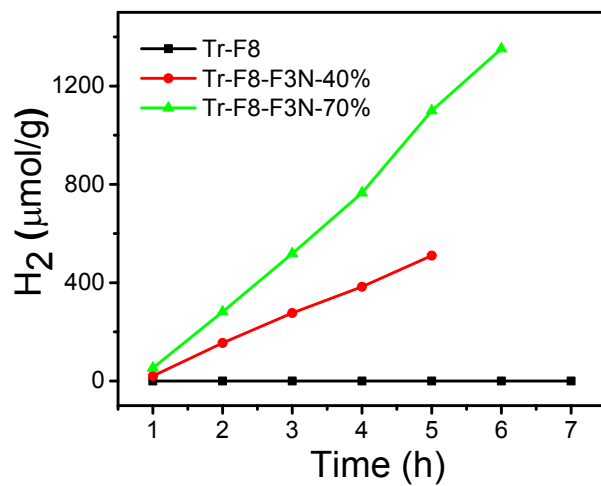

**Fig. S16** Hydrogen evolution as a function of time of Tr-F8, Tr-F8-F3N-40% and Tr-F8-F3N-70% (with ascorbic acid as sacrificing electron donor).

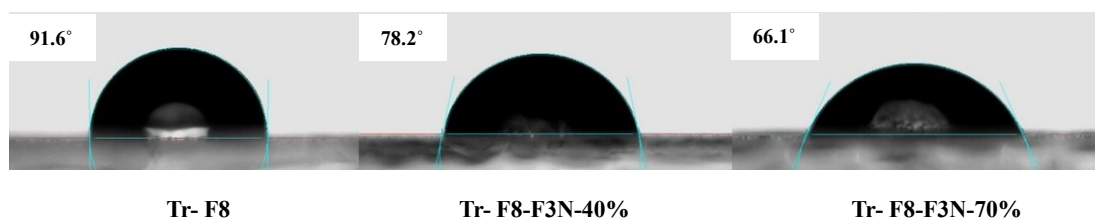

**Fig. S17.** Water contact angle measurements of Tr-F8, Tr-F8-F3N-40% and Tr-F8-F3N-70%.

**Scheme S1** Synthetic routes to the CPPs of Tr-F8, Tr-F8-F3N-40% and Tr-F8-F3N-70%.

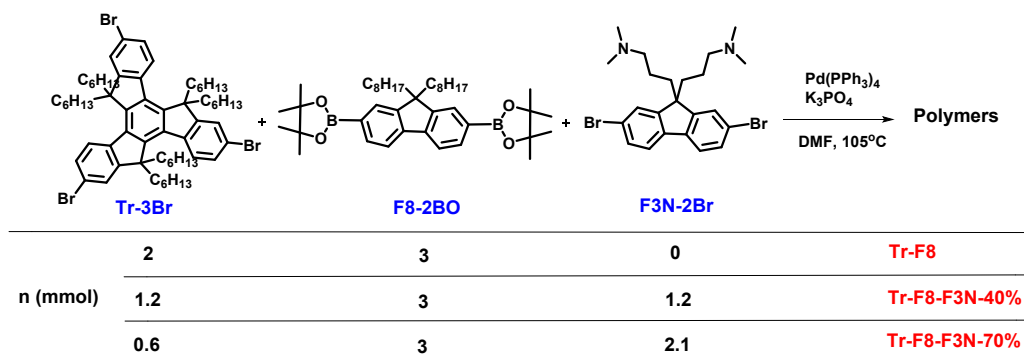

**Table S1** Element analysis and Pd residue results for Tr-F8 and Tr-F3N.

| CMPs            | Tr-F8      |                           |                          | Tr-F3N     |                           |                          |
|-----------------|------------|---------------------------|--------------------------|------------|---------------------------|--------------------------|
|                 | Calcd. (%) | Found (% before reaction) | Found (% after reaction) | Calcd. (%) | Found (% before reaction) | Found (% after reaction) |
| C               | 89.49      | 90.48                     | 88.15                    | 86.86      | 85                        | 85.5                     |
| H               | 10.21      | 9.52                      | 11.85                    | 10.02      | 11.2                      | 11.54                    |
| N               | --         | --                        | --                       | 3.12       | 2.8                       | 2.96                     |
| Pd <sup>a</sup> | --         | 8.9 ppm                   | --                       | --         | 6.9 ppm                   | --                       |

<sup>a</sup> (ppm), Pd residue in the polymers was obtained by ICP-MS measurements.

**Table S2** Summary of the HER without Pt as a co-catalyst for the reported CPPs.

| CPPs         | HER ( $\mu\text{mol h}^{-1} \text{g}^{-1}$ ) | Ref. |
|--------------|----------------------------------------------|------|
| CP-CMP10     | 174                                          | 1    |
| NP-2         | 194                                          | 2    |
| PCP2-100%PDI | 2057                                         | 3    |
| PrCMP-3      | 25                                           | 4    |
| PCP4e        | 9428                                         | 5    |
| CTF-2        | 0                                            | 6    |
| PE-CMP       | 716                                          | 7    |
| PCTF-8       | 136                                          | 8    |
| NP-5         | 200                                          | 9    |
| PyBT-0~7     | 54~525                                       | 10   |
| PhBT-0~10    | 9.5~471                                      | 10   |
| DBTD-CMP1    | 2460                                         | 11   |
| DBTD-CMP2    | 188                                          | 11   |
| DBTD-CMP3    | 116                                          | 11   |
| L-PyBT       | 556                                          | 12   |
| S-CMP3       | 6076                                         | 13   |

**Table S3** Element analysis and Pd residue results for Tr-F8, Tr-F8-F3N-40%, and Tr-F8-F3N-70%.

| CMPs            | Tr-F8      |           | Tr-F8-F3N-40% |           | Tr-F8-F3N-70% |           |
|-----------------|------------|-----------|---------------|-----------|---------------|-----------|
|                 | Calcd. (%) | Found (%) | Calcd. (%)    | Found (%) | Calcd. (%)    | Found (%) |
| C               | 89.49      | 90.48     | 88.30         | 88.58     | 87.23         | 87.61     |
| H               | 10.21      | 9.52      | 10.40         | 10.05     | 10.30         | 10.11     |
| N               | --         | --        | 1.30          | 1.37      | 2.47          | 2.28      |
| Pd <sup>a</sup> | 10.4       |           | 8.9           |           | 7.3           |           |

<sup>a</sup> (ppm), residue in the polymers was obtained by ICP-MS measurements.

## REFERENCES

- (1) R. S. Sprick, J.-X. Jiang, B. Bonillo, S. Ren, T. Ratvijitvech, P. Guiglion, M. A. Zwijnenburg, D. J. Adams, A. I. Cooper, *J. Am. Chem. Soc.*, 2015, **137**, 3265.
- (2) D. Schwarz, Y. S. Kochergin, A. Acharjya, A. Ichangi, M. V. Opanasenko, U. Lappan, P. Arki, J. He, J. Schmidt, P. Nachtigall, A. Thomas, M. J. Bojdys, *Chem. Eur. J.*, 2017, **23**, 13023.
- (3) L. Li, Z. Cai, *Polym. Chem.*, 2016, **7**, 4937.
- (4) Y. Xu, N. Mao, S. Feng, C. Zhang, F. Wang, Y. Chen, J. Zeng, J. Jiang, *Macromol. Chem. Phys.*, 2017, **218**, 1700049.
- (5) L. Li, Z. Cai, Q. Wu, W.-Y. Lo, N. Zhang, L. X. Chen, L. Yu, *J. Am. Chem. Soc.*, 2016, **138**, 7681.
- (6) C. Meier, R. Sprick, A. Monti, P. Guiglion, J.-S. M. Lee, M. A. Zwijnenburg, A. I. Cooper, *Polymer*, 2017, **126**, 283.
- (7) R. S. Sprick, B. Bonillo, M. Sachs, R. Clowes, J. R. Durrant, D. J. Adams, A. I. Cooper, *Chem. Commun.*, 2016, **52**, 10008.
- (8) A. Bhunia, D. Esquivel, S. Dey, R. Fernández-Terán, Y. Goto, S. Inagaki, P. V. D. Voorta, C. A. Janiak, *J. Mater. Chem. A*, 2016, **4**, 13450.
- (9) S. Dana, A. Amitava, I. Arun, L. Pengbo, V. O. Maksym, R. G. Fabian, A. F. K. Tobias, and J. B. Michael, *Chem. Eur. J.*, 2018, **24**, 11916.
- (10) Y. Xu, N. Mao, C. Zhang, X. Wang, J. Zeng, Y. Chen, F. Wang, J. Jiang, *Appl. Catal. B-Environ.*, 2018, **228**, 1.
- (11) Z. J. Wang, X. Y. Yang, T. J. Yang, Y. B. Zhao, F. Wang, Y. Chen, J. H. Zeng, C. Yan, F. Huang, J. X. Jiang, *ACS Catal.*, 2018, **8**, 8590.
- (12) C. Cheng, X. C. Wang, Y. Y. Lin, L. Y. He, J. X. Jiang, Y. F. Xu, F. Wang, *Polym. Chem.*, 2018, **9**, 4468.
- (13) R. S. Sprick, Y. Bai, A. A. Y. Guilbert, M. Zbiri, C. M. Aitchison, L. Wilbraham, Y. Yan, D. J. Woods, M. A. Zwijnenburg, A. I. Cooper, *Chem. Mater.*, 2019, **31**, 305.
